# Supplementary material for: Preterm infants at low risk for early-onset sepsis differ in early fecal microbiome assembly
Source: PubMed Central journal article supplement (PMC9733690; doi:10.1080/19490976.2022.2154091), 2022-12-06

**Table S1. Clinical details for episodes of bacteremia and negative infection evaluations**

| Episode #                     | Group   | Blood culture DOL | Blood culture organism              | Other culture obtained | Other culture organism | Indication for evaluation                                         | Final Diagnosis <sup>1</sup>               | Antibiotic type (days) <sup>2</sup>                                                                            |
|-------------------------------|---------|-------------------|-------------------------------------|------------------------|------------------------|-------------------------------------------------------------------|--------------------------------------------|----------------------------------------------------------------------------------------------------------------|
| <b>Episodes of bacteremia</b> |         |                   |                                     |                        |                        |                                                                   |                                            |                                                                                                                |
| 1                             | LRE     | 9                 | <i>Staphylococcus epidermidis</i>   | None                   | N/A                    | Increased apnea events and abdominal distension and discoloration | CLABSI                                     | Gentamicin (9 d)<br>Vancomycin (10 d)                                                                          |
| 2                             | Non-LRE | 9                 | <i>Klebsiella pneumoniae</i>        | CSF                    | No growth              | Leukocytosis on routine check prompting evaluation                | CLABSI                                     | Gentamicin (3 d)<br>Vancomycin (2 d)<br>Cefepime (10 d)                                                        |
| 3                             | Non-LRE | 29                | <i>Streptococcus agalactiae</i>     | CSF                    | No growth              | Lethargy with abdominal distention and emesis                     | BSI with ileus                             | Gentamicin (4 d)<br>Vancomycin (2 d)<br>Piperacillin-tazobactam (11 d)                                         |
| 4                             | Non-LRE | 14                | <i>Serratia marcescens</i>          | CSF                    | No growth              | Increased apnea events                                            | CLABSI, meningitis with cerebral abscesses | Gentamicin (6 d)<br>Vancomycin (1 d)<br>Cefepime (37 d)<br>Meropenam (11 d)<br>Piperacillin-tazobactam (2 d)   |
| 5                             | Non-LRE | 14                | <i>K. pneumoniae ssp pneumoniae</i> | None                   | N/A                    | Increased abdominal distension and emesis                         | BSI/NEC                                    | Piperacillin-tazobactam (4d)<br>Vancomycin (3d)<br>Gentamicin (1 d)<br>Cefepime (20 d)<br>Metronidazole (21 d) |
| 6                             | Non-LRE | 11                | <i>Escherichia coli</i>             | CSF                    | No growth              | Increased apnea events                                            | BSI                                        | Gentamicin (3 d)<br>Vancomycin (1 d)<br>Cefepime (3 d)<br>Ceftazadime (8 d)                                    |
| 7                             | Non-LRE | 30                | <i>E. coli</i>                      | CSF and urine          | No growth              | Increased apnea events                                            | BSI and NEC                                | Gentamicin (3 d)<br>Vancomycin (9 d)<br>Cefepime (4 d)                                                         |

|   |         |    |                                          |                   |                                                |                                                                       |                                       |                                                                                                                               |
|---|---------|----|------------------------------------------|-------------------|------------------------------------------------|-----------------------------------------------------------------------|---------------------------------------|-------------------------------------------------------------------------------------------------------------------------------|
|   |         |    |                                          |                   |                                                |                                                                       |                                       | Ceftazadime (1 d)<br>Piperacillin-tazobactam (11 d)                                                                           |
| 8 | Non-LRE | 16 | <i>Staphylococcus aureus</i>             | Abscess and CSF   | <i>S. aureus</i> (abscess);<br>No growth (CSF) | Increased oxygen requirement and mass on flank concerning for abscess | CLABSI with abscess                   | Vancomycin (6 d)<br>Gentamicin (3 d)<br>Oxacillin (28 d)<br>Rifampin (4 d)<br>Cefipime (2 d)<br>Piperacillin-tazobactam (8 d) |
| 9 | Non-LRE | 11 | <i>E. coli</i> and <i>S. epidermidis</i> | Tracheal aspirate | <i>E. coli</i>                                 | Increased oxygen or respiratory support                               | CLABSI, could not rule out meningitis | Gentamicin (6 d)<br>Vancomycin (10 d)<br>Cefepime (23 d)                                                                      |

**LOS evaluations with negative cultures managed without extended antibacterial treatment**

|    |         |    |           |                             |                                                |                                                                                |                                     |                                      |
|----|---------|----|-----------|-----------------------------|------------------------------------------------|--------------------------------------------------------------------------------|-------------------------------------|--------------------------------------|
| 10 | LRE     | 7  | No growth | None                        | N/A                                            | Abdominal symptoms: emesis and discoloration                                   | Not infected                        | Gentamicin (1 d)<br>Vancomycin (3 d) |
| 11 | LRE     | 7  | No growth | None                        | N/A                                            | Hyperglycemia after manipulation for procedure; increased apnea events         | Not infected                        | Gentamicin (2 d)<br>Vancomycin (3 d) |
| 12 | Non-LRE | 33 | No growth | Urine and viral panel       | No growth                                      | Increased oxygen or respiratory support                                        | Postnatal cytomegalovirus infection | Gentamicin (2 d)<br>Vancomycin (3 d) |
| 13 | LRE     | 6  | No growth | None                        | N/A                                            | Increased bands on routine complete blood count                                | Not infected                        | Gentamicin (1 d)<br>Vancomycin (2 d) |
| 14 | LRE     | 28 | No growth | Tracheal aspirate and urine | CoNS (tracheal aspirate);<br>No growth (urine) | Increased oxygen or respiratory support and leukopenia on complete blood count | Not infected                        | Gentamicin (2 d)<br>Oxacillin (3 d)  |
| 15 | Non-LRE | 13 | No growth | Urine                       | No growth                                      | Increased apnea events                                                         | Not infected                        | Gentamicin (2 d)<br>Vancomycin (3 d) |
| 16 | Non-LRE | 14 | No growth | None                        | N/A                                            | Increased oxygen or respiratory support                                        | Not infected                        | Gentamicin (2 d)<br>Vancomycin (2 d) |

**Footnotes:** <sup>1</sup>Sites for blood culture for episodes of bacteremia are as follows – 1) central line, 2) both central line and peripheral, 3) peripheral, 4) peripheral, 5) peripheral, 6) peripheral, 7) peripheral, 8) central line and peripheral, and 9) peripheral. All LOS evaluations with negative results were peripheral cultures except episode 16 which was a central line culture. <sup>2</sup>All antibiotic courses were started after blood culture was obtained; different antibiotics do not always

start on the same day. Abbreviations – *BSI*, blood stream infection; *CLABSI*, central line-associated blood stream infection; *CoNS*, coagulase-negative staphylococci; *CSF*, cerebrospinal fluid; *DOL*, day of life; *LRE*, low-risk for early-onset sepsis; *LOS*, late-onset sepsis; *N/A*, not applicable; *NEC*, necrotizing enterocolitis.

**Table S2. Number of samples and patients included in the microbiome analysis for each time period**

| <b>Hours after birth</b>          | <b>No. of samples</b> | <b>No. of patients</b> | <b>Median samples per patient, (IQR)</b> |
|-----------------------------------|-----------------------|------------------------|------------------------------------------|
| 0 to $\leq$ 72 hours (Days 1-3)   | 22                    | 17                     | 0 (0-1)                                  |
| 73 to $\leq$ 168 hours (Days 4-7) | 76                    | 40                     | 1 (1-2)                                  |
| 169 to $\leq$ 336 hours (Week 2)  | 66                    | 46                     | 1 (1-2)                                  |
| 337 to $\leq$ 504 hours (Week 3)  | 47                    | 42                     | 1 (1-2)                                  |
| 505 to $\leq$ 672 hours (Week 4)  | 41                    | 41                     | 1 (1-2)                                  |
| 673 to $\leq$ 840 hours (Week 5)  | 49                    | 43                     | 1 (1-2)                                  |
| 841 to $\leq$ 1080 hours (Week 6) | 54                    | 41                     | 1 (1-2)                                  |
| $\geq$ 1081 hours (Week 7)        | 5                     | 5                      | 0 (0-0)                                  |
| Total                             | 360                   | 48                     | 7 (7-9)                                  |

**Figure S1. Diet characteristics in study cohort.** (a) Cumulative incidence of infants receiving antibiotics during hospitalization. (b) Timelines depicting the number of study infants to whom the corresponding antibiotics were administered. (c) Number of infants administered mother's milk, donor milk, and formula throughout the study. (d) Percentage of infants who were nil per os in each day of life. (e) Timeline of diet and fortification. Each square of the grid represents one day in the life of an infant enrolled in the study. Abbreviations – *LRE*, low-risk for early-onset sepsis.

**A**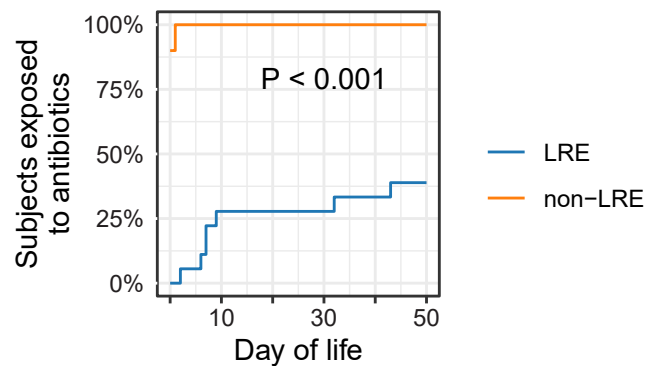**B**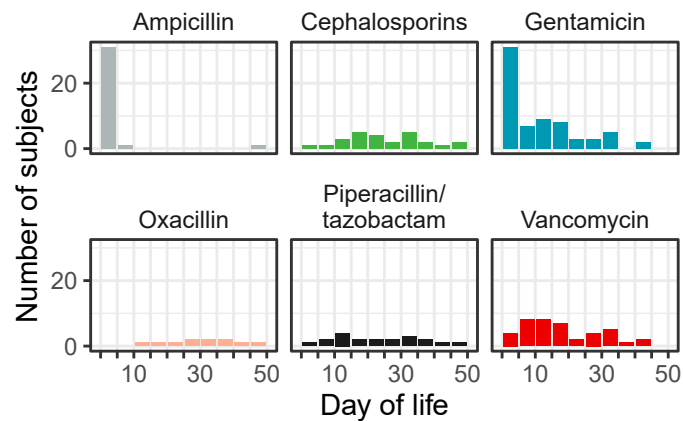**C**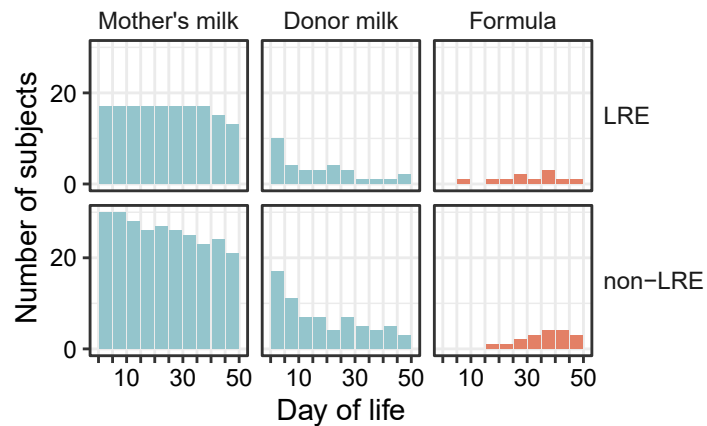**D**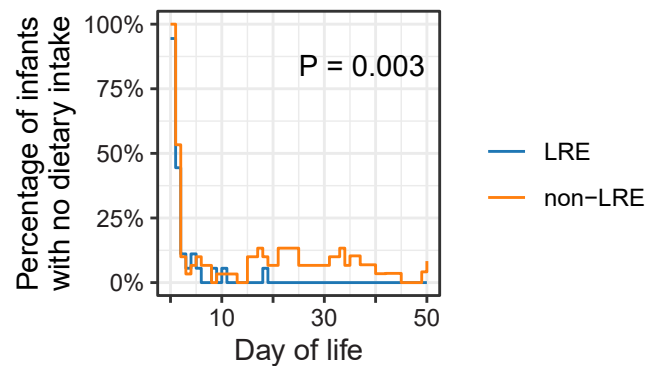

**E**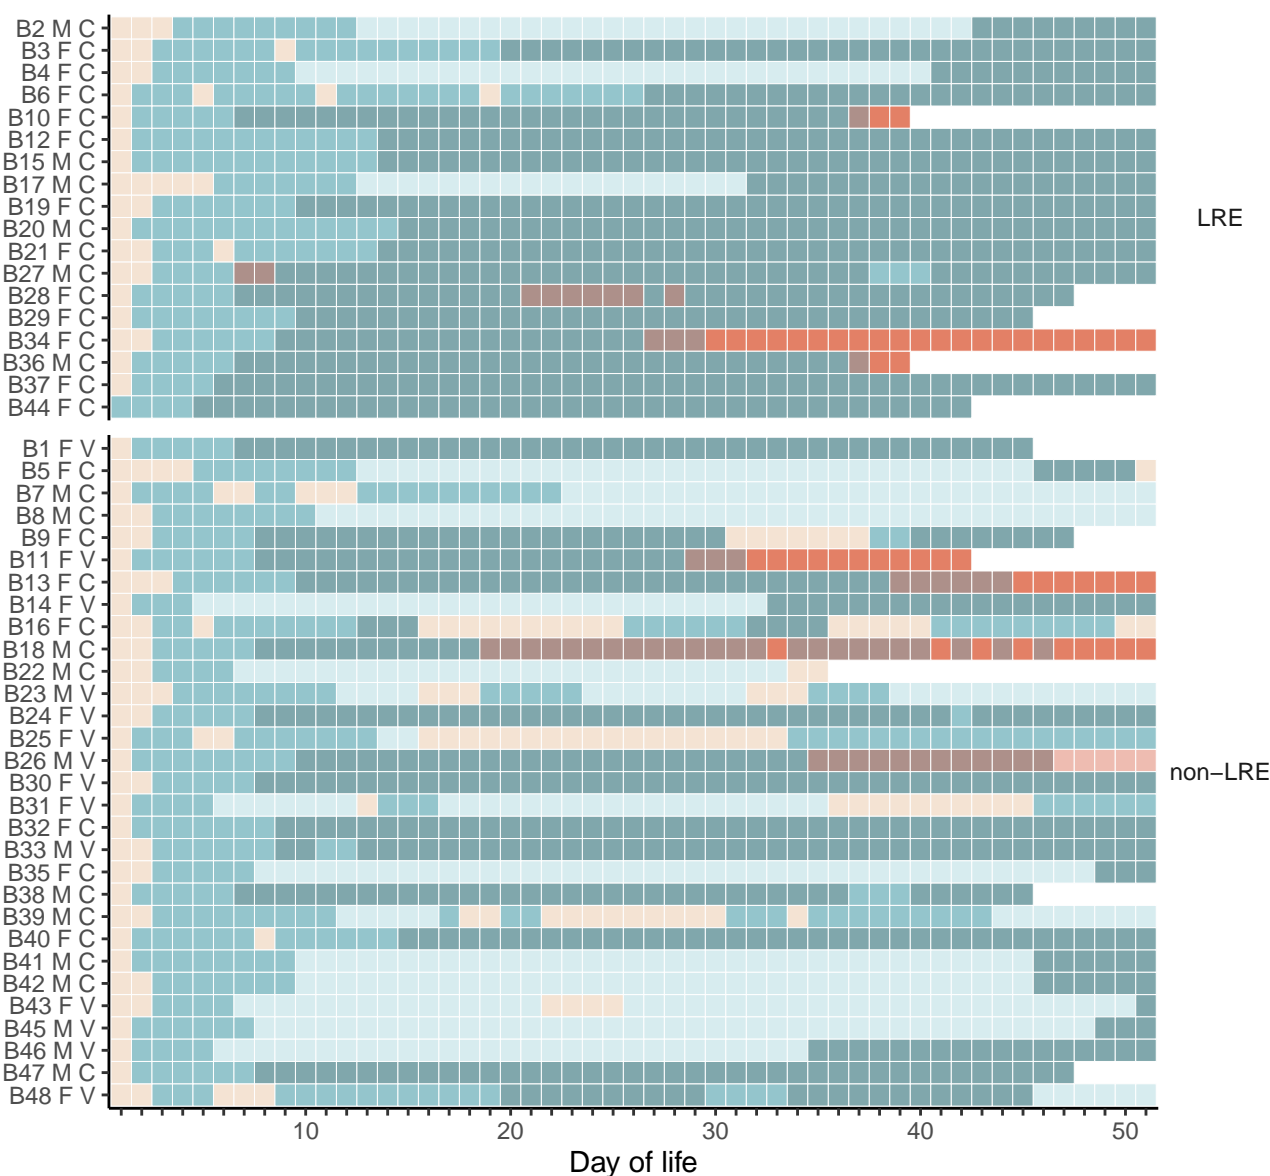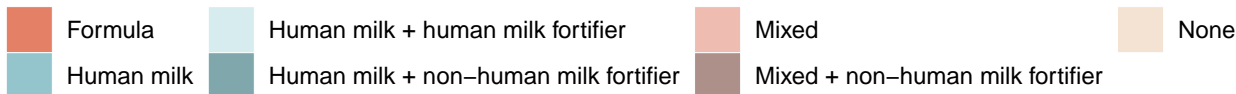

**Figure S2. Bacterial community composition during the first week of life.** All samples from the first week were subjected to Principal Coordinates Analysis using Bray-Curtis distance. Samples from days 1-3 (0-72h) are shown separately from those obtained on days 4-7 (72-168h) of life. Abbreviations – *LRE*, low-risk for early-onset sepsis.



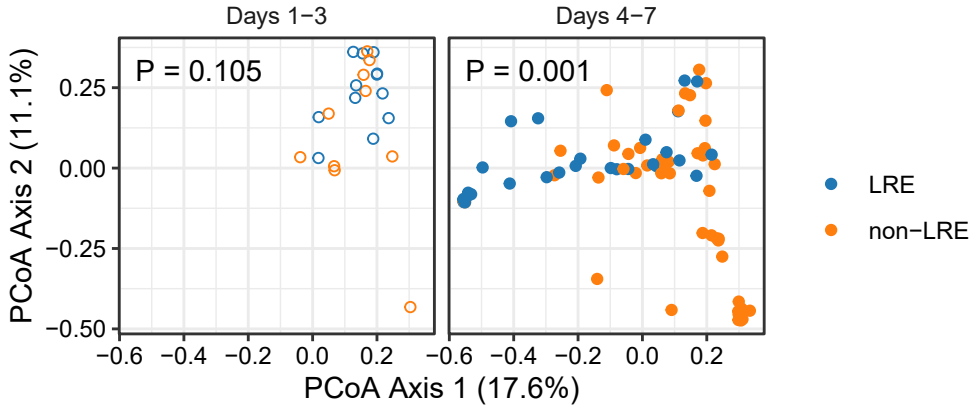

**Figure S3. Bacterial community composition and species relative abundance after the first week of life.** (a) Bray-Curtis distance between samples collected after the first week of life. (b) Bacterial species found to be increasing more rapidly in LRE (*Citrobacter freundii*, *Enterobacter cloacae*, and *Escherichia coli*) or non-LRE infants (*Enterococcus faecalis*) after the first week of life. (c) Bacterial species found to be increasing or decreasing in abundance with infant age in both groups but were not different between LRE and non-LRE infants. Abbreviations – *LRE*, low-risk for early-onset sepsis.

**A**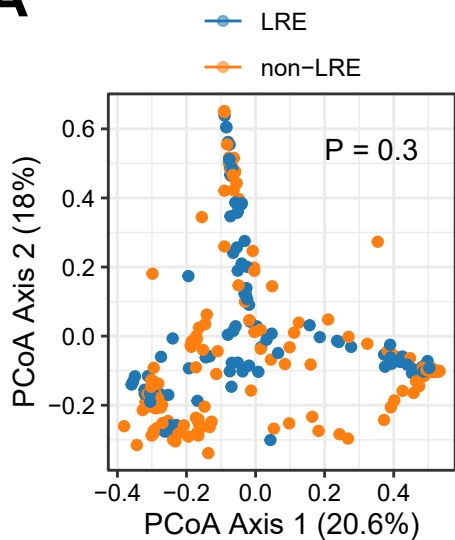**B**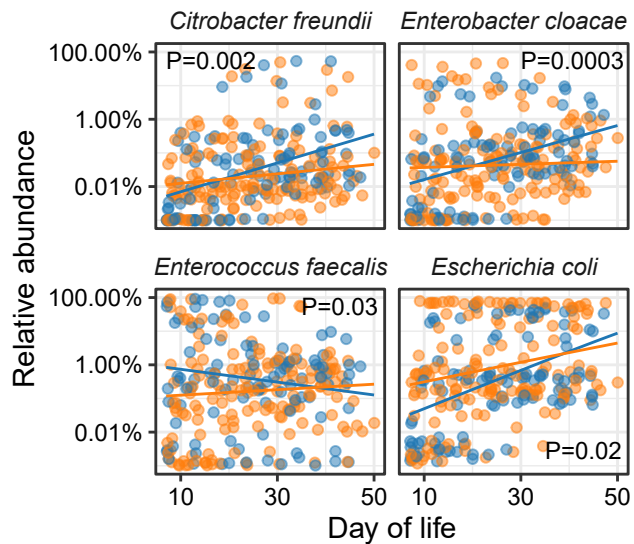**C**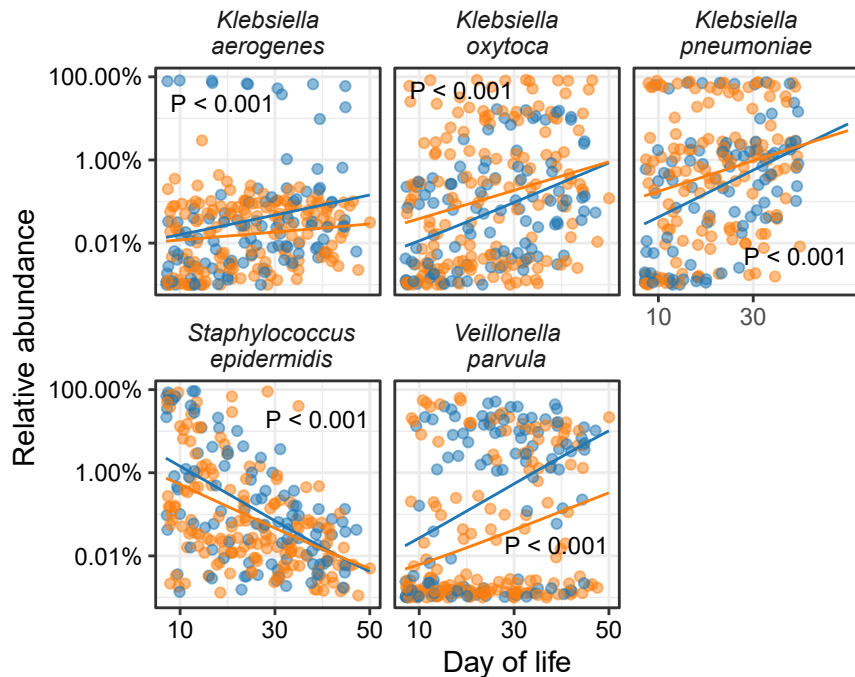

**Figure S4. Abundance of virulence factors in the microbiome of LRE vs. non-LRE infants.** Gene orthologs are shown if one or more time points differed between LRE and non-LRE groups. In each plot, the x-axis has units of reads per kilobase gene length per million reads (RPKM) in each sample. Lines extend from the first to the third quartile, and the median is indicated by a point. An asterisk indicates a difference in gene abundance between LRE and non-LRE infants after controlling for a 5% false discovery rate. Abbreviations – *LRE*, low-risk for early-onset sepsis.

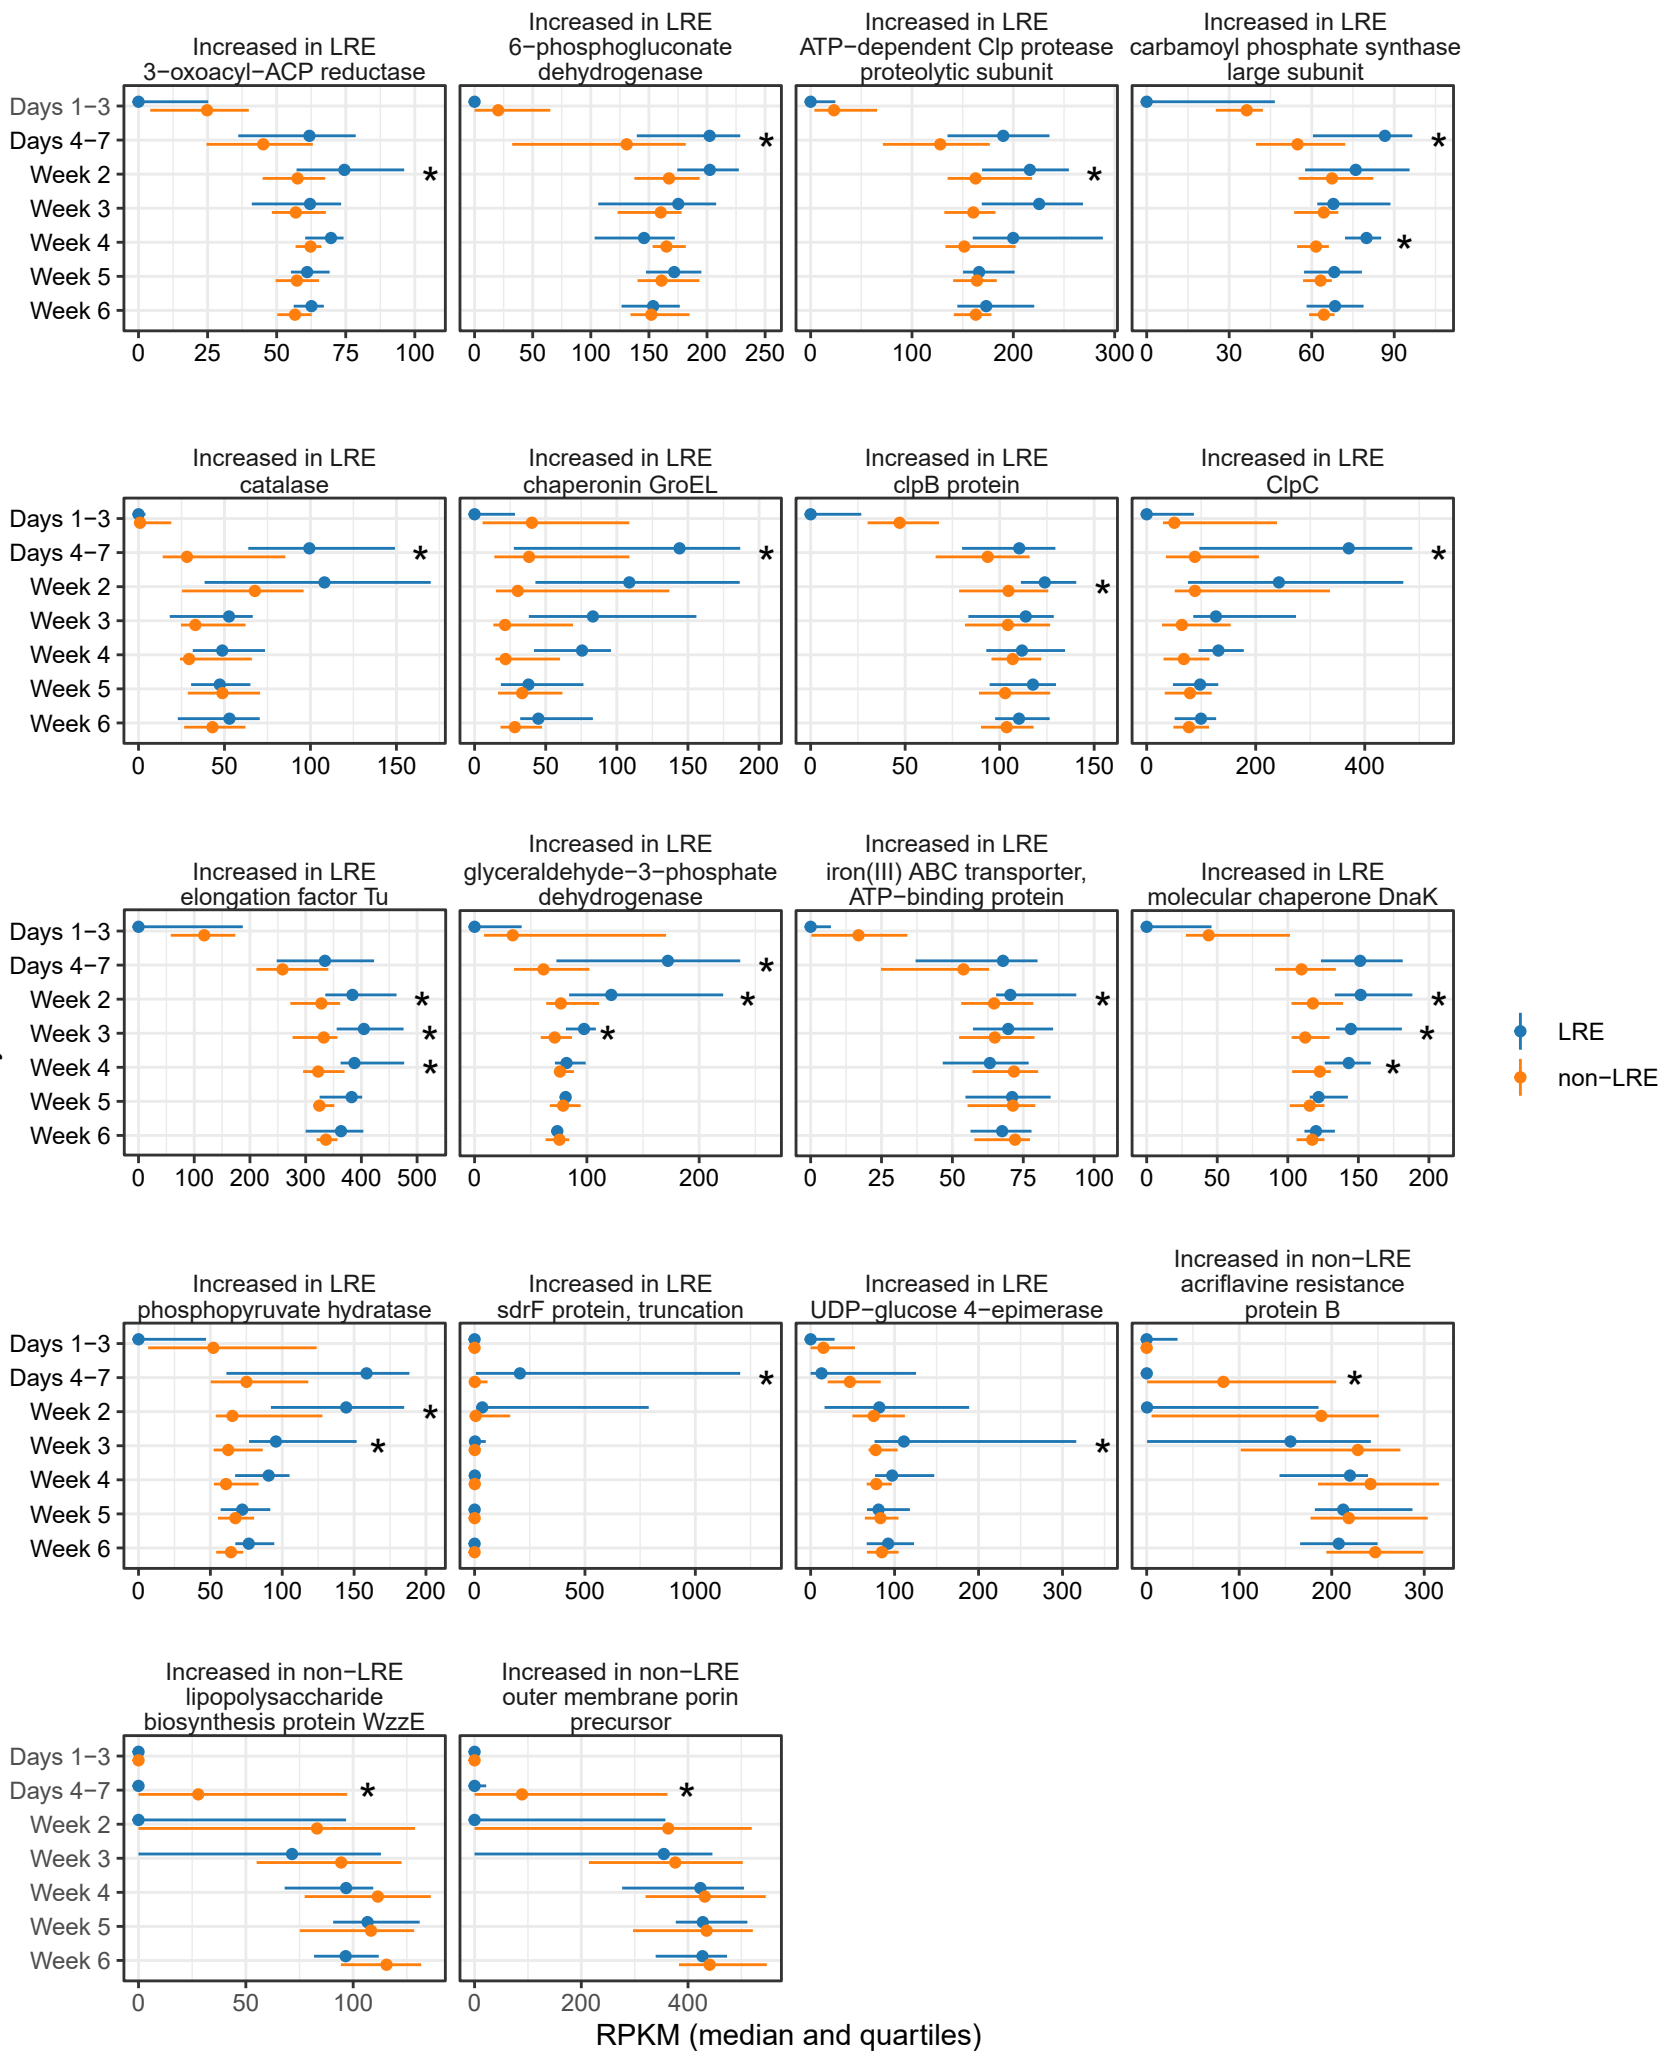

**Figure S5. Abundance of antibiotic resistance genes in the microbiome of LRE vs. non-LRE infants.** Gene orthologs are shown if one or more time points differed between LRE and non-LRE groups. In each plot, the x-axis has units of reads per kilobase gene length per million reads (RPKM) in each sample. Lines extend from the first to the third quartile, and the median is indicated by a point. An asterisk indicates a difference in gene abundance between LRE and non-LRE infants after controlling for a 5% false discovery rate. Abbreviations – *LRE*, low-risk for early-onset sepsis.

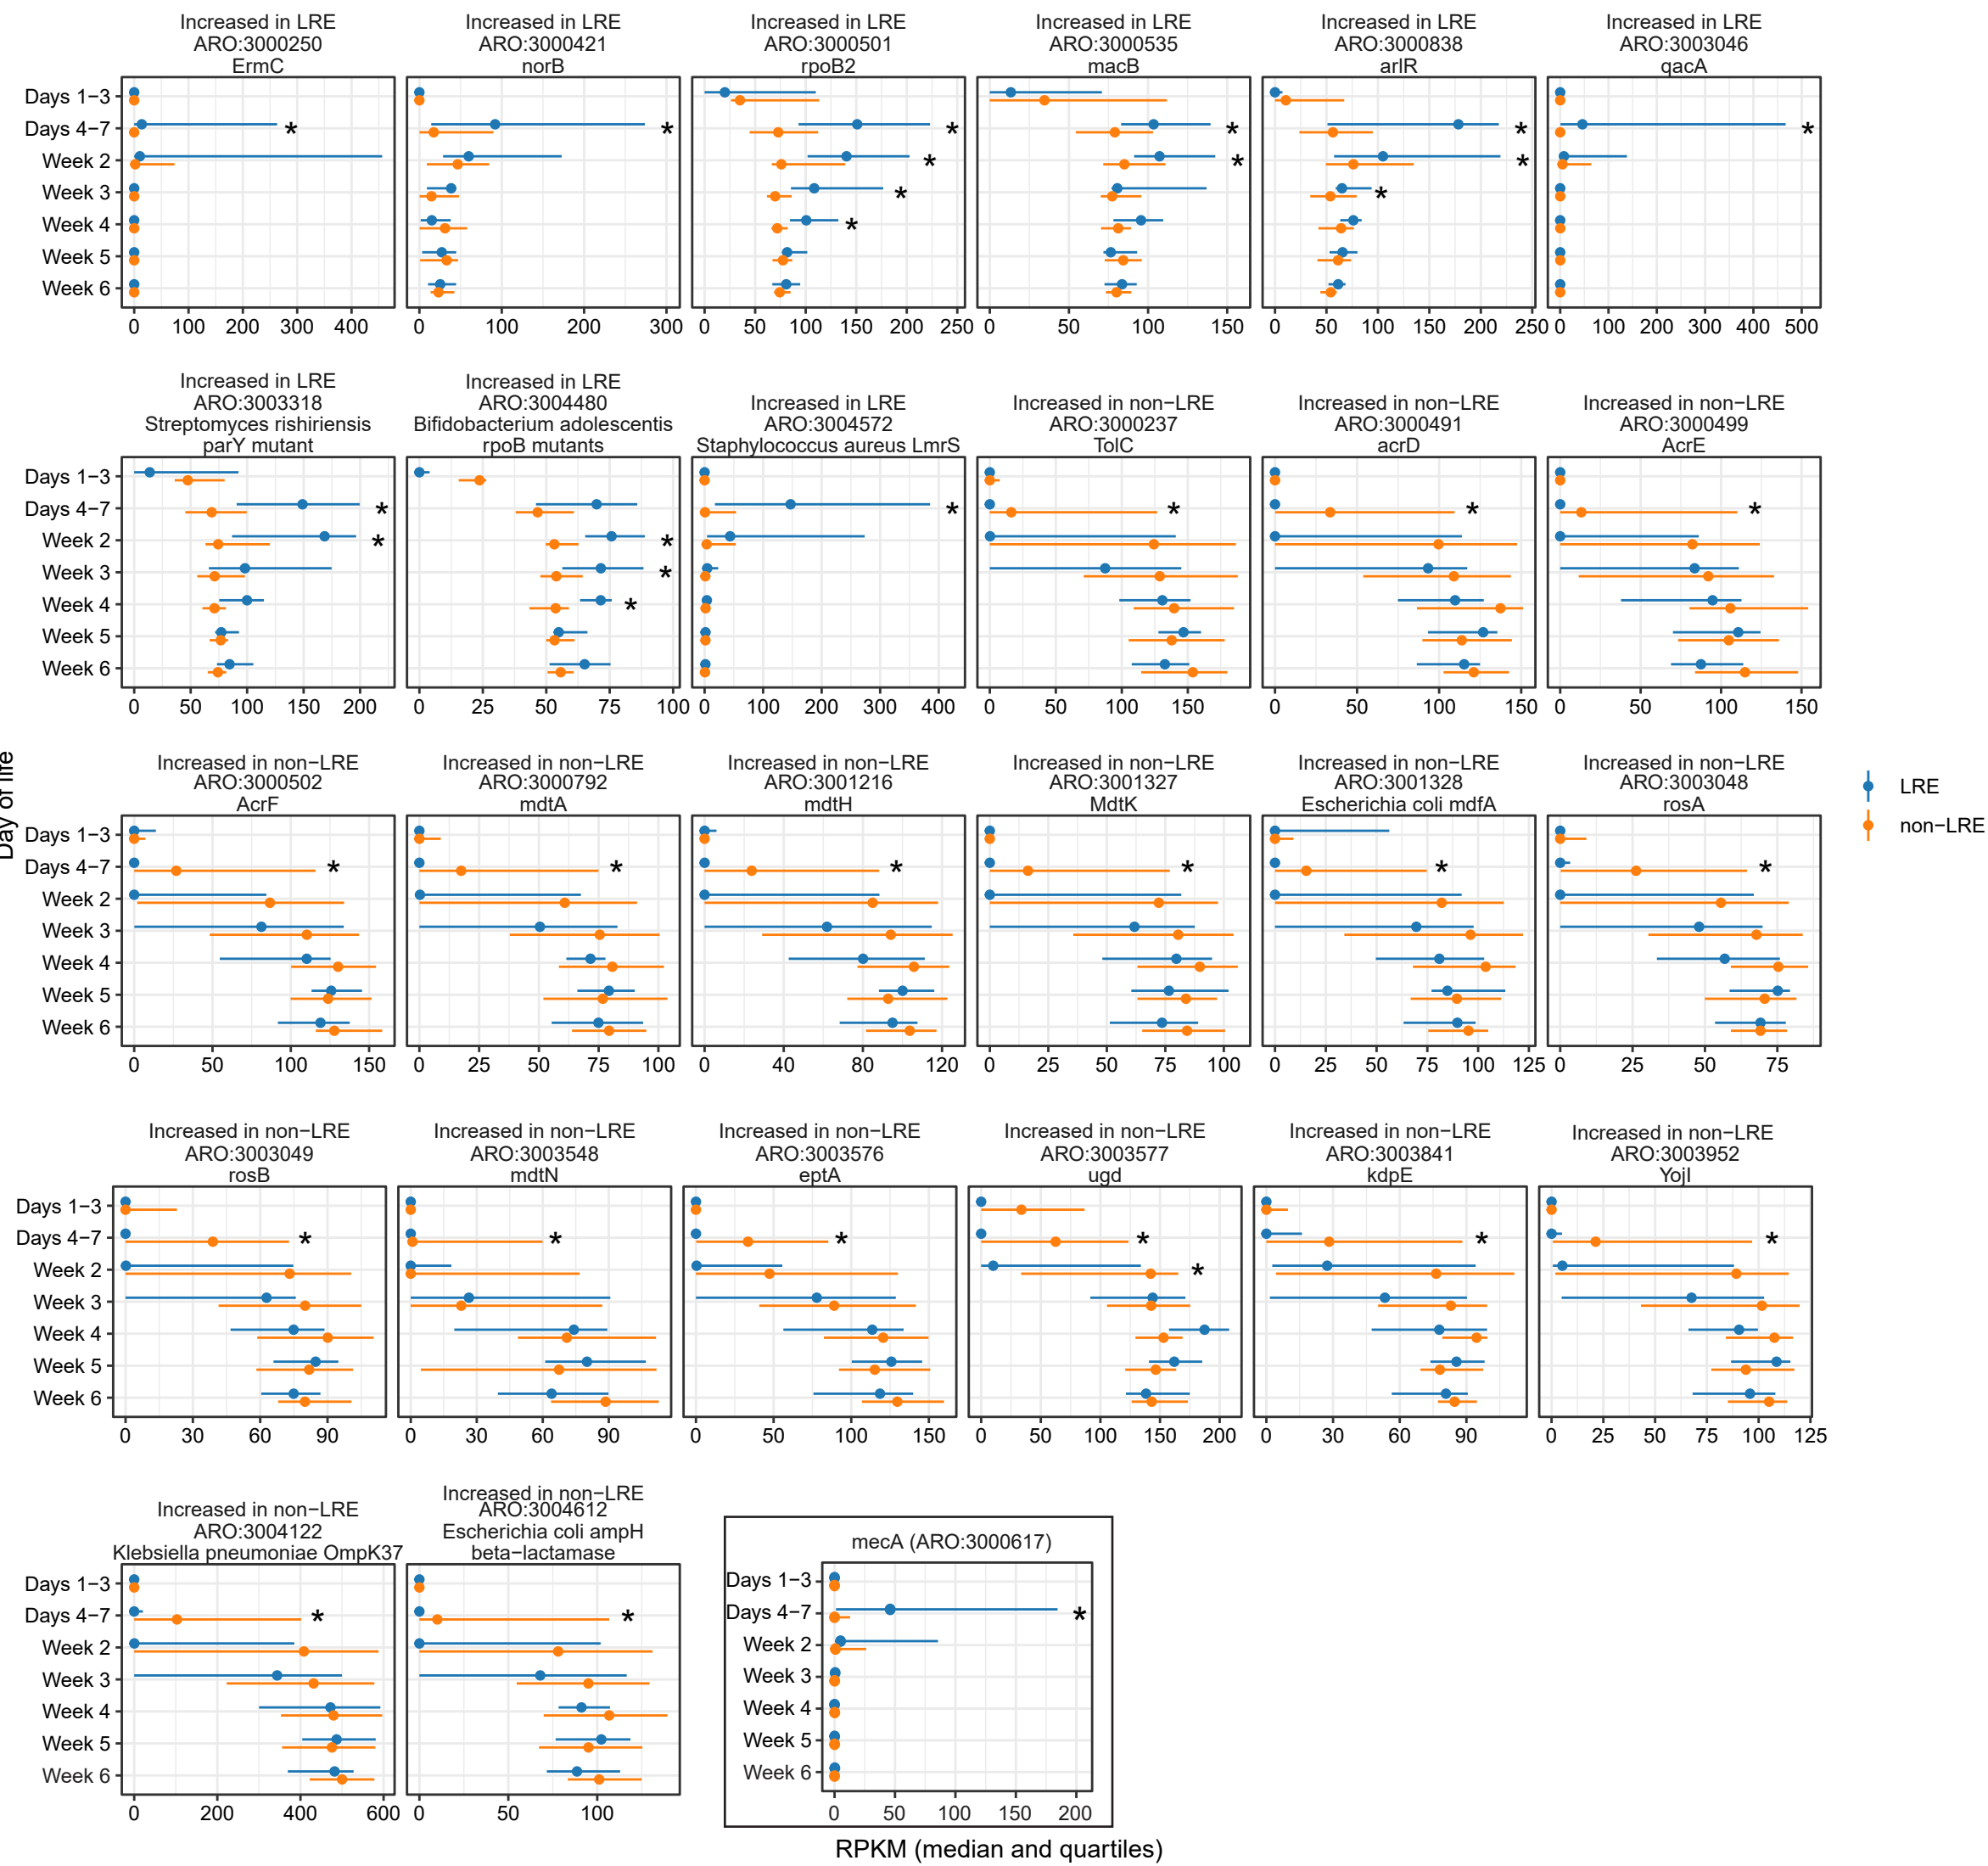

**Figure S6. Microbiome characteristics in pre-antibiotic samples obtained prior to episodes of bacteremia compared to episodes with negative evaluations.** (a) Timeline of diet, antibiotics, clinical culture results, and sample collection for episodes of bacteremia. Each square represents a day in the life of the child with the episode. A filled black dot (•) denotes a fecal sample, a large open circle (○) denotes a negative blood culture, a diagonal cross denotes (×) denotes a positive blood culture, and colored lines above the boxes indicate the type of antibiotics administered. (b) Relative abundance of bacterial species in the pre-antibiotic sample from each episode. Points are highlighted if the species was obtained from blood culture in that episode. (c) Timeline of diet, antibiotics, clinical culture results, and sample collection for episodes of suspected bacteremia evaluations that resulted in negative cultures. (d) Shannon diversity and the number of observed bacterial species in pre-antibiotic specimens between episodes that resulted in a diagnosis of bacteremia versus those with negative evaluations. (e) Detection of species causing bacteremia in pre-antibiotic samples from infants with subsequent bacteremia and from pre-antibiotic samples from infants with a negative evaluation.



**A** — Ampicillin — Gentamicin — Oxacillin — Vancomycin — Cephalosporins  
 — Meropenem — Piperacillin/tazobactam  
 ● Fecal sample collection ○ Negative blood culture × Positive blood culture — Exposure to antibiotics

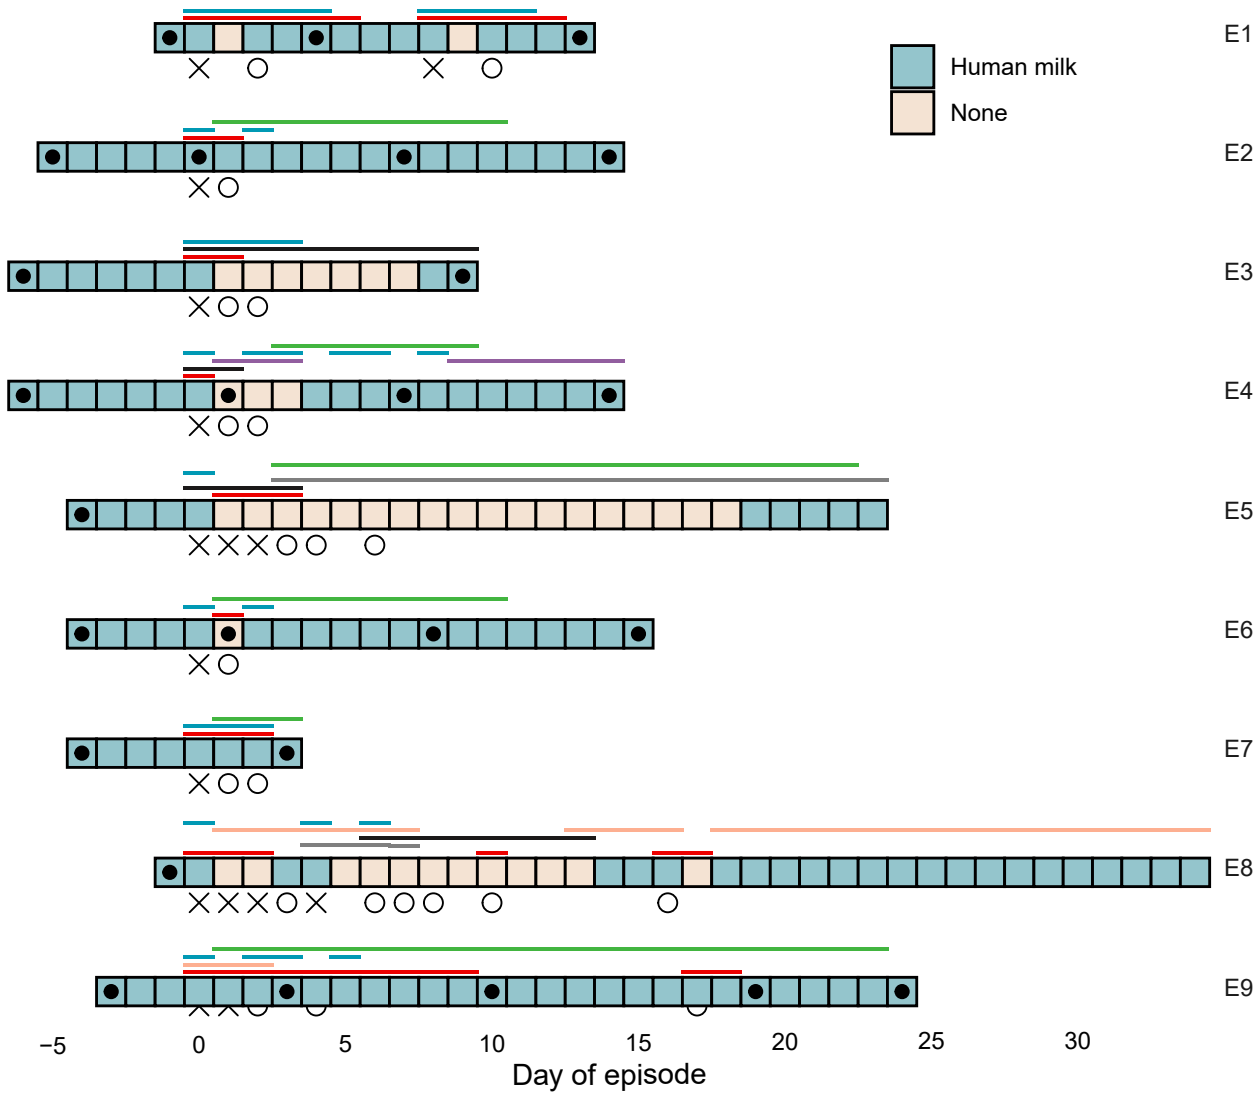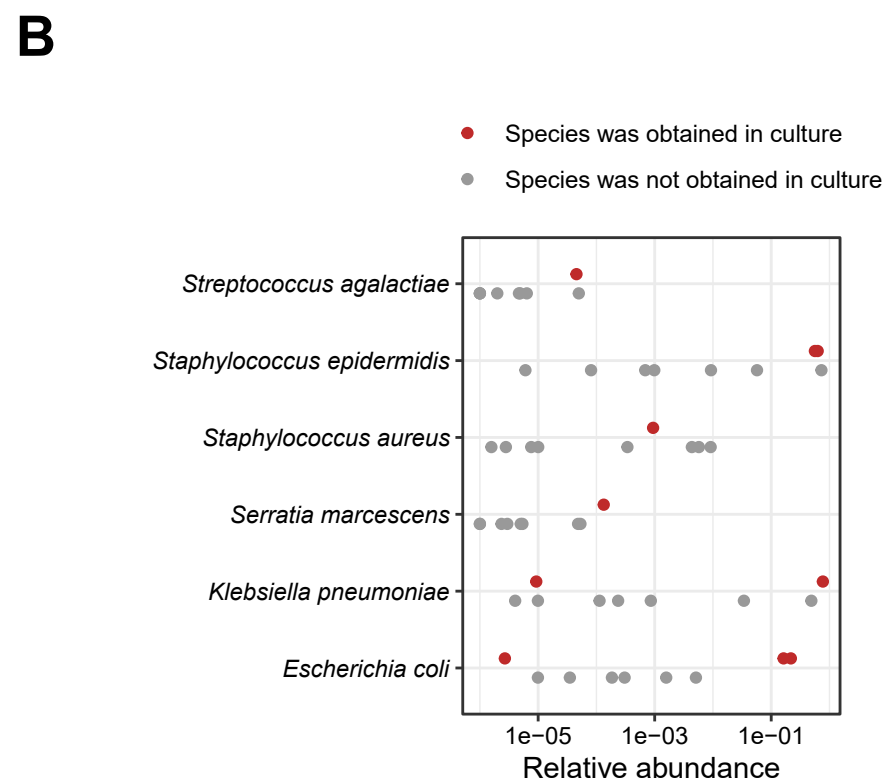

**C**

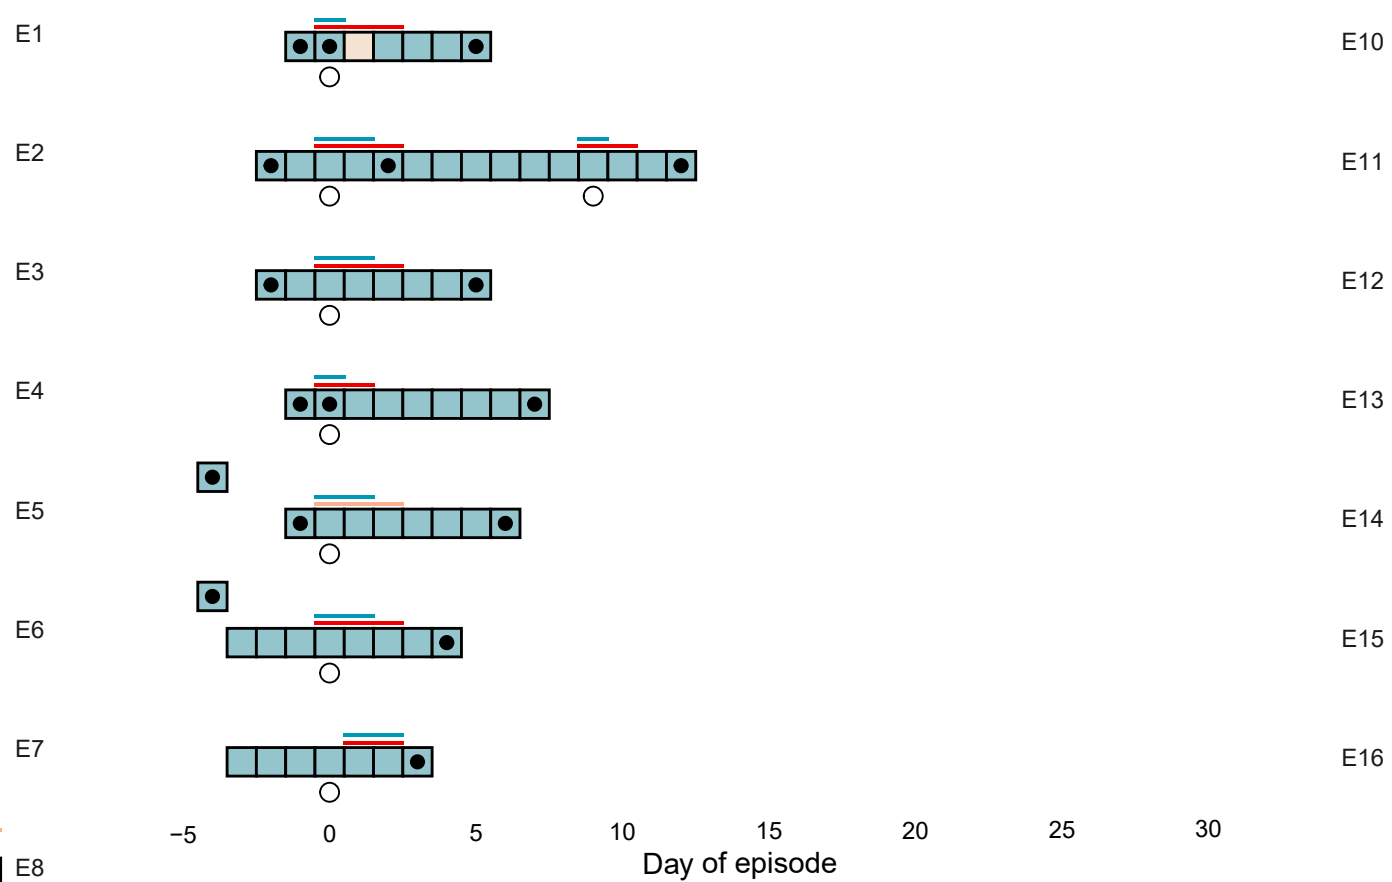

**D**

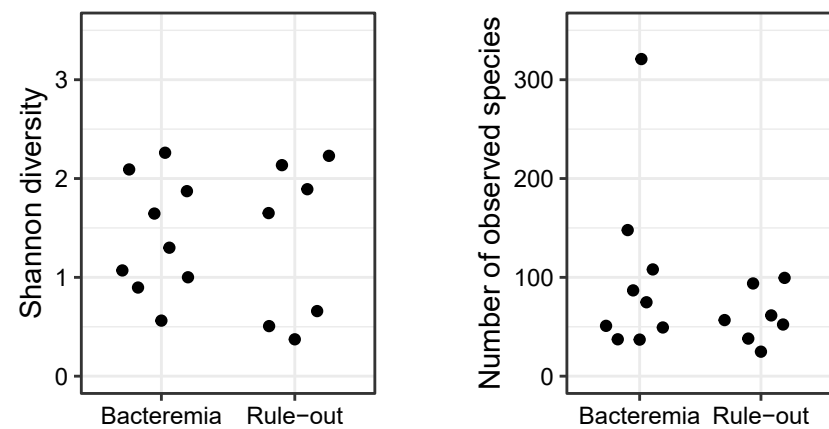

**E**

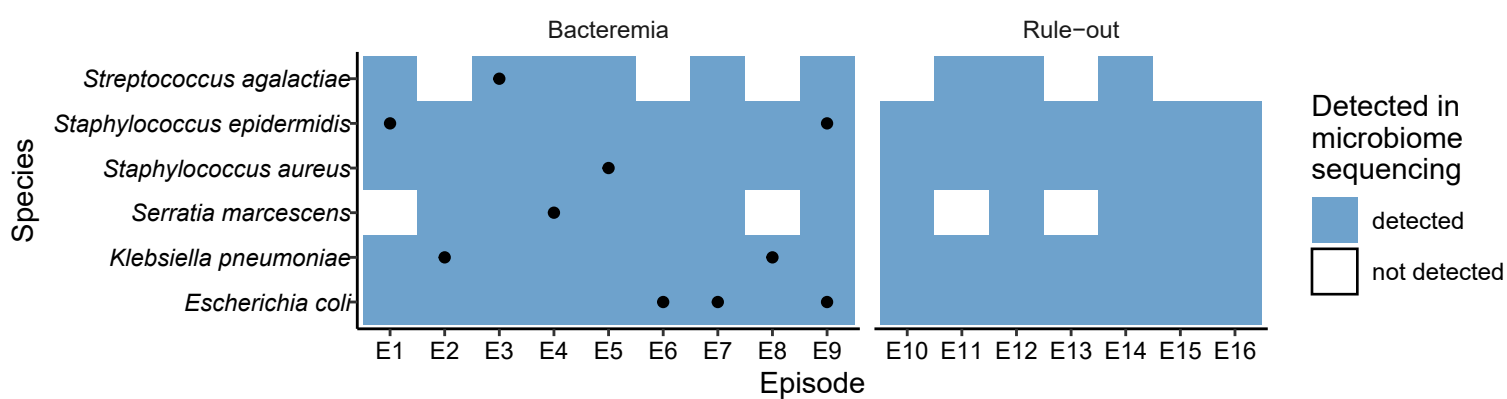

Supplement: KGMI_A_2154091_SM3804.pdf [file KGMI_A_2154091_SM3804.pdf]
